# On the Origins of the Cerebral IVIM Signal

Hannah V. Hare<sup>1</sup>, Robert Frost<sup>2</sup>, James A. Meakin<sup>3</sup>, Daniel P. Bulte<sup>1,4</sup>

1. Oxford Centre for Functional Magnetic Resonance Imaging of the Brain (FMRIB), Nuffield Department of Clinical Neurosciences, University of Oxford, Oxford, UK.
2. Martinos Center, MGH, Harvard University, Charlestown, MA 02129, USA.
3. Diagnostic Image Analysis Group, RadboudUMC, 6525 GA Nijmegen, the Netherlands.
4. Institute of Biomedical Engineering, Department of Engineering Science, Old Road Campus, University of Oxford, Oxford, UK.

Corresponding author: Daniel Bulte, IBME, Department of Engineering Science, Oxford.

e: [daniel.bulte@eng.ox.ac.uk](mailto:daniel.bulte@eng.ox.ac.uk)

p: +44 01865 617687

Key words: MRI, IVIM, CBF, ASL, CSF

Word count: 4,206

## Abstract

### **Purpose**

Intravoxel incoherent motion (IVIM) has been proposed as a means of non-invasive MRI measurement of perfusion parameters such as blood flow and blood volume. Its main competitor in the brain is arterial spin labelling (ASL). In theory, IVIM should not suffer from some of the same limitations as ASL such as poor signal in white matter, and assumptions about arterial arrival times that may be violated in the presence of pathology.

### **Methods**

In this study we aimed to test IVIM as a viable alternative to ASL for quantitative imaging of perfusion parameters in the brain. First, a direct comparison was performed between IVIM and multi-post label delay pseudo-continuous ASL; second, IVIM images were acquired with and without nulling cerebrospinal fluid; and finally, ultra-high resolution IVIM was performed to minimise partial voluming.

### **Results**

In all three tests, IVIM failed to disprove the null hypothesis, strongly suggesting that, at least within the brain, the technique does not measure perfusion parameters as proposed.

### **Conclusion**

Furthermore, the results obtained suggest that the contrast visible in IVIM-derived images is primarily sensitive to cerebrospinal fluid, and not the microvascular blood compartment.

## Introduction

Intravoxel incoherent motion (IVIM) is a unique magnetic resonance imaging (MRI) approach to measuring blood volume and perfusion in the body (1). As its name suggests, it relies only on the motion of water molecules within a single voxel, and it should thus be capable of making equally valid measurements throughout the entire vascular network, including within white matter in the brain. This benefit may outweigh the method's relative disadvantages compared to arterial spin labelling (ASL) (functional imaging would be difficult as a full dataset is required to derive a single perfusion map), whilst still allowing for non-invasive imaging of cerebral perfusion, especially in the presence of very slow-moving blood. The aim of this work was to assess the viability of using IVIM to measure resting cerebral blood volume and perfusion.

ASL is capable of non-invasively measuring cerebral perfusion using MRI in a clinically feasible imaging time. Although it suffers from poor signal-to-noise (SNR), recent advances in the suppression of background signal and Bayesian analysis approaches have enabled a transition from research into clinical practice (2), and several institutions now include ASL as a standard sequence in their protocols. However, the ASL signal is fundamentally limited by the  $T_1$  decay of the blood, so that even very long post-label delay times are not able to reliably quantify very slow-moving blood. White matter perfusion is notoriously difficult to measure using ASL (3); similarly, it is very challenging to obtain perfusion values in areas of cerebral occlusions or in the presence of collateral flow, which are typically identified on ASL images by a lack of blood signal. This creates particular challenges for other MRI techniques which rely on ASL data for perfusion information, such as calibrated MRI. To date, calibrated MRI techniques have been applied to investigate various aspects of the healthy human brain, both at rest and in response to a range of functional stimuli, but they have rarely been applied in cases of pathology, even within a research setting (4-6). At the time of writing only a single study had applied the method in patients. De Vis et al. reported artefacts arising from delayed arrival of arterial blood in 3 out of 11 patients scanned with internal carotid artery occlusions, leading to unreliable estimates of oxygen extraction and consumption (7). Thus the areas likely to be of greatest interest in the monitoring of oxygen metabolism are simultaneously the areas of least confidence for ASL perfusion measures.

Velocity-selective ASL was developed to overcome this limitation by creating a tagging scheme sensitive to the change in velocity of arterial water molecules rather than their position (8). However, this technique suffers from even lower SNR than other flavours of ASL, at least for normal arterial arrival times.

Intravoxel incoherent motion was first developed by Le Bihan in the 1980s (1), and is based on the

premise that both diffusion and microvascular perfusion result in motion of water molecules in all directions (at the macroscopic scale of a voxel), but at different temporal scales, with water in the capillaries moving more quickly than water in intra-cellular space. This leads to a biexponential model of diffusion signal as a function of b-value, with very low b-values (less than  $\sim 100 \text{ s/mm}^2$ ) exhibiting a greater rate of signal decay due to capillary flow. The MR signal will be attenuated by both diffusion and perfusion according to

$$S = S_0 \{ (1 - f_v) e^{-bD} + f_v e^{-bD^*} \} \quad (1)$$

In addition to the classical diffusion coefficient ( $D$ ), a ‘pseudo-diffusion coefficient’  $D^*$  is introduced, along with the fraction of fast-diffusing spins,  $f_v$ , which is usually interpreted as the capillary blood volume fraction in each voxel. The product  $f_v D^*$  is then a measure of perfusion, in units of  $\text{mm}^2/\text{s}$ , which may be converted to traditional CBF units of  $\text{ml blood}/100 \text{ g tissue}/\text{minute}$  via the following equation (9):

$$\text{CBF} = \frac{6\lambda}{L\langle l \rangle} f_v D^* \quad (2)$$

where  $\lambda$  is the fraction of MR-visible water,  $L$  is the total length of the capillary network and  $\langle l \rangle$  is the mean capillary length. Capillary lengths cannot be measured non-invasively; they have been shown to vary with age (10) and region (11) within subcortical structures, but appear to be remarkably constant across the cortex (10,12). However, they may be expected to vary significantly in cases of pathology. For this reason  $f_v D^*$  values are not usually converted to traditional perfusion units. The term ‘perfusion’ will be used throughout this manuscript with the understanding that it refers to the pattern of blood flow through the capillaries, and not specifically to the delivery of oxygen or nutrients to the tissue. This is true for both ASL and IVIM imaging.

IVIM has been used to study the liver (13-17), kidney (18-20) and pancreas (21-23) without the need for an injected tracer, which can be particularly valuable in cases where contrast agents are contraindicated. However, its application within the brain has been a subject of controversy for many years (9,24,25). Results can vary significantly depending on the specific fitting algorithm that is used (26), as well as on experimental parameters such as TE (23) and the range of b-values measured (27,28). Concerns have also been raised about biases introduced by fitting low SNR data (29,30), and contaminating effects of cerebrospinal fluid (CSF) due to bulk motion during the cardiac cycle or simple partial voluming (31).

Despite these complications, IVIM continues to be applied in the brain as well as numerous abdominal organs. IVIM-derived parameters have shown promise in the characterisation and monitoring of head and

neck tumours (32-36). Going one step further, Federau et al. have reported quantitative changes in IVIM perfusion during hypercapnia (37) and visual stimulation (38), despite earlier work failing to achieve this in animal models (39).

The aim of this work was to investigate IVIM as a potential method for acquiring reliable, quantitative blood volume and/or perfusion information in the healthy brain. First, a direct comparison was performed between IVIM and ASL, a method capable of quantifying blood flow within grey matter which has been repeatedly validated against PET (40-42). Second, the impact of CSF on the IVIM signal was assessed by application of a CSF-nulled diffusion sequence. Finally, high-resolution IVIM data were acquired to isolate and compare signals arising from grey matter, white matter and CSF.

## Methods

### *Experiment 1*

10 subjects were scanned on a 3 T Siemens Verio scanner with a 32-channel head coil under FMRIB's developmental ethics agreement. A standard 6:28-minute multi-post label delay pseudo-continuous ASL (PCASL) scan was run (6 delay times ranging 250–1500 ms) with 15 slices and voxel dimensions 3.4×3.4×6 mm (43). Head and body coil calibration images and field maps were also acquired. All PCASL data were pre-processed using FSL tools for motion and field map correction, and analysed using the BASIL toolbox (44).

For the IVIM, a standard diffusion sequence was run with b-values of 0, 10, 20, 40, 80, 110, 140, 170, 200, 300, 400, 500, 600, 700, 800 and 900 s/m<sup>2</sup>, acquired in three orthogonal directions with a twice-refocused spin echo (45) and an EPI readout. Simulations have suggested that a minimum of 10 b-values should be acquired in order provide sufficient points for reliable biexponential signal fitting (27), and the distribution used in the present study was chosen with reference to recent literature applying IVIM in the brain within a clinical setting (35). Other parameters included TE 84 s, TR 4 s, bandwidth 1086 Hz/pixel, echo spacing 0.99 ms, Fourier 6/8, GRAPPA off. Images were acquired at the same matrix size and resolution as PCASL data. In order to match the PCASL imaging time, 2 repetitions were acquired and averaged on the scanner, with an imaging time of 6:12 minutes. A b = 0 image with reversed phase-encoding was also acquired.

A 1 mm isotropic MPRAGE structural scan was acquired, which was segmented using FMRIB's Automated Segmentation Tool (FAST) (46) and registered to both ASL and IVIM space using FLIRT

(47). Grey matter (GM) and white matter (WM) masks were created from voxels with partial volume estimates of 50% or above.

### *Experiment 2*

One subject was re-scanned with an adapted protocol which was designed to identify signal arising from the CSF compartment. A non-selective bandwidth-modulated adiabatic selective saturation and inversion (BASSI) pulse was applied to null signal from spins with  $T_1 = 3700$  ms (inversion region thickness = 10,000 mm) (48), and only a single slice was acquired to ensure optimal CSF suppression. Imaging time and other parameters were identical to those set out in Experiment 1. For comparison, a second set of IVIM images was acquired with the BASSI voltage set to 0 for no CSF suppression. A PCASL scan was also performed, as described above.

Because of anticipated difficulties in registering a single slice to a structural image, a double inversion recovery sequence was run at the same resolution as the IVIM diffusion scans to obtain a suitable grey matter mask. Inversion times were set at 550 and 4150 ms prior to the excitation pulse. The resulting image was field map corrected using FUGUE (49) and manually thresholded to create a grey matter mask.

### *Experiment 3*

In order to analyse IVIM signals definitively originating only from a single tissue type (i.e. with minimal partial voluming), 6 subjects were scanned on a 3T Siemens Prisma with a high-resolution readout-segmented EPI (rs-EPI) diffusion-weighted sequence (50) using a 32-channel head coil. This allowed for a 1 mm isotropic resolution with minimal distortions, such that partial voluming could be avoided in a substantial subset of voxels. In order to maintain sufficient SNR the 6:14-minute protocol was repeated 6 times. Because of the potential for motion over this long scan time, the images were not averaged. The rs-EPI sequence was set up with TE 69 ms, TR 1.6 s, bandwidth 766 Hz/pixel, 5 readout segments, echo spacing 0.4 ms, GRAPPA factor 2. b-values were identical to those in Experiments 1 and 2, but were acquired with Stejskal-Tanner (single-refocused spin echo) encoding to minimise TE and maximise SNR (51).

An MPRAGE scan was performed at the same resolution and matrix size as the diffusion scan. This was segmented using FAST (46) to estimate the relative proportions of GM, WM and CSF in every voxel. Due to the increased spatial resolution and scan time masks could be created from voxels with 100% of the relevant tissue type.

## *IVIM Fitting*

IVIM data from Experiments 1 and 3 were first corrected for motion and eddy current distortions (52). The reversed phase-encoding  $b = 0$  scan was used to correct for susceptibility-induced distortions in Experiment 1 using the TOPUP tool (53). Because the data acquired in Experiment 2 was for a single slice only, it was not possible to apply eddy corrections or TOPUP. Instead, a field map was used in conjunction with FUGUE (49) to reduce distortions near the sinuses.

A biexponential model was fitted to each voxel in two steps (26,37) using least squares fitting in MATLAB (MathWorks, Natick, MA, USA). This approach aims to mitigate the problem of overfitting, under the assumption that  $D^*$  is substantially larger than  $D$  and may be neglected for large  $b$ -values. First, a monoexponential model was fit to  $b$ -values greater than 200 to estimate  $D$ :

$$S = S_0 e^{-bD} \quad (3)$$

Then the full biexponential model was fit to all  $b$ -values, with fixed  $D$ , to estimate  $f_v$  and  $D^*$ :

$$S = S_0 \{ (1 - f_v) e^{-bD} + f_v e^{-bD^*} \} \quad (4)$$

$S_0$  was unconstrained in both cases.

## *Statistical Comparisons*

For Experiment 1, GM masks were applied to ASL and IVIM images. Voxels with  $f_v > 0.3$  were excluded from masks as this is unphysiological, presumably as a result of CSF contamination (35). Correlations between ASL perfusion and IVIM  $f_v$  and perfusion were hypothesised to be linear and were assessed by computing the Pearson product-moment correlation coefficients ( $r$ ) and the corresponding  $p$ -values, where  $p < 0.05$  was deemed to be significant.

In Experiment 2, IVIM analysis was performed both on a voxelwise and a region of interest (ROI) basis. For ROI fitting, the signal was averaged across all  $b$ -directions and all GM voxels in order to boost SNR.

Voxelwise fitting was performed on data from Experiment 3, and the IVIM-derived parameter maps were visually compared to structural images. Correlations between blood volume fraction  $f_v$  and GM, WM and CSF fraction of partially volumed voxels were investigated by plotting 2D histograms. Box plots were created to compare the distributions of  $f_v$  and perfusion in pure GM, WM and CSF.

## Results

### *Experiment 1*

Average grey matter results are presented in table 1. White matter perfusion cannot be reliably measured using ASL because of the long arterial arrival time (3); however, no such limitation applies to IVIM.  $f_v D^*$  in white matter was found to be  $0.81 \pm 0.20 \times 10^{-3} \text{ m}^2/\text{s}$ , leading to a GM/WM perfusion ratio of  $1.87 \pm 0.88$  (ranging from 1.12 to 3.97 in individual subjects).

Figure 1 shows ASL and IVIM maps for a subset of slices acquired from a representative subject, along with the GM mask used for IVIM parameters. The GM masks for ASL are almost identical to those for IVIM, with small differences arising from slightly different distortions between the two readouts and any motion between the scans. Maps for ASL and IVIM perfusion look qualitatively similar, with the same features visible on both sets of images. Quantitatively however, no significant correlation was observed between ASL and IVIM perfusion (figure 2(a),  $r = 0.090$ ,  $p = 0.805$ ) or ASL and IVIM  $f_v$  (figure 2(b),  $r = 0.107$ ,  $p = 0.768$ ).

### *Experiment 2*

Figure 3 shows the results of the voxelwise fitting of both standard and CSF-suppressed IVIM sequences, along with an ASL perfusion map of the same slice and the GM mask created from a double inversion recovery sequence. CSF signal was successfully suppressed, as may be seen by comparing the  $b = 0$  images in the top row. Both blood volume fraction and perfusion maps from IVIM fits bear some resemblance to the ASL map for the case of standard IVIM; however, this similarity disappears in the CSF-suppressed case.

The ROI-averaged fits for standard and CSF-suppressed IVIM signals are shown in figure 4. For the standard case, the signal clearly exhibits biexponential behaviour. With CSF suppression the fits perform almost equally well; statistically the biexponential model produces a marginally higher  $R^2$ , which appears to be driven by a closer fit for  $b < 40 \text{ s/m}^2$ , but visually there is little difference between the two fits.

### *Experiment 3*

Figure 5 shows maps of IVIM parameters from a single representative subject, alongside a structural image and the CSF partial volume estimate map derived from it. Areas with the highest IVIM blood



volume fractions  $f_v$  clearly correspond to those with the highest CSF fraction, and no obvious contrast between grey and white matter is seen in IVIM maps. All fits were done on a voxelwise basis with no smoothing or averaging applied. For reference, fits for 3 randomly selected voxels from the same subject, which contain 100% GM, WM and CSF respectively, are shown in figure 6.

Structural images and blood volume fraction ( $f_v$ ) maps for all subjects are displayed in figure 7. Also shown are 2D histograms exploring the relationship between GM, WM and CSF partial volume estimates (pve) and IVIM blood volume fraction. No correlation is seen for GM or WM, but a positive trend is observed for CSF. Note that extreme values (100% pve voxels,  $f_v = 1$ ) have been excluded from these histograms. Figure 8 compares the distribution of  $f_v$  and  $f_v D^*$  in the form of box plots for a single subject, derived only from voxels with no partial voluming. These show considerably higher  $f_v$  and  $f_v D^*$  in CSF compared to GM or WM. Extreme outliers were observed for all tissue types and were excluded from the plots.  $f_v D^*$  was significantly different in CSF compared to WM ( $p < 0.001$  in all subjects) and GM ( $p < 0.05$  in all subjects, and  $p < 0.001$  in 4 of the 6).  $f_v D^*$  in GM and WM differed significantly in only 3 subjects ( $p < 0.05$ ), but in all 6 cases the median values were slightly higher in WM than in GM.

## Discussion

IVIM claims to be a quantitative model (9), yet conclusive validation of the method within the brain is still lacking, with past studies reporting both positive (54) and negative (55) correlations between  $f_v$  and DSC or ASL MRI methods, respectively. Although qualitative similarities were observed between IVIM parameters and ASL perfusion maps (figure 1), this study found no significant correlation between average GM values across a group of 10 subjects (figure 2).

At a low spatial resolution, contrast between grey and white matter is markedly reduced but still visible in IVIM parameters compared to ASL (figures 1 and 3). This is unsurprising given the limitations on arterial arrival time that ASL is subject to, meaning that WM perfusion will always be underestimated in ASL images. The mean ratio of GM/WM perfusion of 1.87 for IVIM compares well with the ratio of 2.07 observed in young healthy volunteers using PET (56), although the individual range in this study (1.12–3.97) was fairly large.

Using literature values for the mean capillary length  $\langle l \rangle$  and the total length of the capillary network  $L$  it should be possible to convert  $f_v D^*$  to traditional units of CBF using equation 1. For the human brain,

values of  $\lambda = 0.78$  [29],  $\langle l \rangle = 53 \mu\text{m}$  (12) and  $L = 1 \text{ mm}$  (57) would result in a CBF of 21.2 ml/100 g/min, somewhat lower than the ASL-derived 50.2 ml/100 g/min in the same cohort. As the definition of what exactly constitutes a capillary is not always clear, it is plausible that the scarce literature on human brain morphometry was based on a slightly different definition than that used in the derivation of the IVIM model.

It is possible that the lack of correlation shown in figure 2 could be caused by different vessel properties (e.g. average length of capillary segments) between individuals. Although the ability to compare absolute perfusion between subjects is very valuable, particularly in clinical cases of potential global hypo- or hyperperfusion, the scientific community is typically more concerned with generating spatial or functional contrast. Thus the question of greatest interest is whether the contrast observed in  $f_v$  and  $f_v D^*$  for a single subject is a true reflection of underlying blood volume or perfusion. Given past concerns over the contaminating effects of CSF signal (31), it is difficult to conclude whether the spatial similarity between ASL and IVIM images in Experiment 1 supports this hypothesis, especially as the majority of GM voxels will also include a sizeable fraction of CSF at this relatively low resolution.

Experiment 2 was designed to try to answer this question by acquiring diffusion data with and without CSF-suppression. At first glance, the results imply that the GM/WM contrast observed in IVIM-derived images is a direct result of CSF signal contamination. When CSF is successfully nulled,  $f_v$  and  $f_v D^*$  values are notably decreased in GM (figure 3), and a simple monoexponential model is adequate for fitting the data (figure 4). This is in agreement with past literature (31).

However, there are several limitations to the method used in Experiment 2. Only a single inversion preparation pulse was implemented; this was timed to maximally suppress signal from the CSF compartment, but inevitably will also have reduced signal from other tissue types. Previous simulation work suggests that when CSF is nulled following a single inversion, signal from arterial blood is reduced to 30% and GM signal to 40% of their respective equilibrium  $M_0$  values (58). Thus the CSF-suppressed data not only has lower SNR compared to the standard case, but also differing relative fractions of blood, GM and WM signal contributions. This makes it difficult to draw firm conclusions from the results.

In a different approach, Experiment 3 acquired IVIM data at a much higher resolution in order to minimise the effects of partial voluming within voxels. Application of a rs-EPI sequence on a high gradient performance Prisma scanner allowed for the acquisition of ten 1 mm isotropic slices in a feasible scan time. The resulting images (see figure 5) show that  $f_v$  and  $f_v D^*$  are elevated in voxels containing CSF

(as expected), but that no contrast is visible between grey and white matter voxels. In addition, there appears to be some consistent correlation between  $f_v$  and CSF fraction, but not with GM or WM fraction, as shown in figure 7. Together, this strongly suggests that  $f_v$  is primarily sensitive to voxelwise CSF content and not true capillary blood volume.

The box plots in figure 8 confirm that  $f_v$  and  $f_v D^*$  are highest in the CSF compartment, and also show that the median  $f_v D^*$  value is marginally higher in WM than GM. The same observations were made for all subjects. Regardless of units, this result is both unexpected and unphysiological for a perfusion contrast (56). It also suggests that the plausible GM/WM ‘perfusion’ ratio observed in Experiment 1 may in fact be an averaged (GM+CSF)/WM ratio.

One possible explanation for the unexpectedly high WM results is overfitting. Throughout this study, data have been analysed using a biexponential fitting procedure for all voxels, even when the simpler monoexponential fit appears to do an adequate job. This was intentional and in accordance with the recent literature (29,37). However, by fitting a biexponential function to a noisy monoexponential decay curve, large values for  $f_v$  can be estimated despite a true underlying  $f_v = 0$ . The anisotropy in WM leads to greater variance in signal across diffusion directions compared to GM (see figure 6), which can masquerade as a lower SNR and may hence lead to poorer fitting.

As previously mentioned, the idea that the biexponential form of the diffusion signal arises from CSF contamination is not new (31). However the fact that this biexponential behaviour was observed even in 100% pure CSF voxels, with resulting  $f_v$  of around 0.4, suggests that IVIM may in fact be measuring CSF motion (either turbulent or related to the cardiac cycle). In larger voxels, the mixing of different tissue types may be an additional contributing factor.

It is difficult to balance the requirements for high spatial resolution (to reduce partial voluming effects), high SNR (to ensure reasonable fitting) and acceptable temporal resolution in order to carry out a functional experiment with IVIM. However, one group has recently reported observing changes in  $f_v D^*$  with hypercapnia (37), visual stimulation (38) and at different phases during the cardiac cycle (59), and interpreted these as increases in classical perfusion. Although absolute signal magnitude is very difficult to interpret, relative changes in IVIM parameters may reflect underlying physiological modulation, somewhat analogous to the blood oxygen level dependent (BOLD) signal. However, the advantages of this method over the BOLD signal are not clear, and the impact of any concurrent changes in CSF volume or pulsatility would need to be considered (60).

There have been a number of studies demonstrating that IVIM can be used to generate clinically useful contrasts in both the abdomen (15,20) and the brain (33,35). For these situations, it may not be important whether the contrast is generated by excess fluid (for example surrounding a tumour) or by true perfusion, and in all probability IVIM will – and should – continue to be a useful tool for creating these qualitative images. However, based on the results presented in this investigation, caution should be exercised in the interpretation of such images, especially if attempting to look beyond basic contrast to draw physiological conclusions from the data. Within the brain in particular, IVIM parameters  $f_v$  and  $f_v D^*$  do not appear to be related strongly to blood volume or perfusion, but rather to CSF content.

## Acknowledgements

EPSRC, MRC, NIHR Oxford Biomedical Research Centre

## Bibliography

1. Le Bihan D, Breton E, Lallemand D, Aubin ML, Vignaud J, Laval-Jeantet M. Separation of diffusion and perfusion in intravoxel incoherent motion MR imaging. *Radiology* 1988;168(2):497-505.
2. Alsop DC, Detre JA, Golay X et al. Recommended implementation of arterial spin-labeled Perfusion mri for clinical applications: A consensus of the ISMRM Perfusion Study group and the European consortium for ASL in dementia. *Magn Reson Med* 2015;73(1):102-116.
3. Van Gelderen P, De Zwart JA, Duyn JH. Pitfalls of MRI measurement of white matter perfusion based on arterial spin labeling. *Magn Reson Med* 2008;59(4):788-795.
4. Bulte DP, Kelly M, Germuska M, Xie J, Chappell MA, Okell TW, Bright MG, Jezzard P. Quantitative measurement of cerebral physiology using respiratory-calibrated MRI. *Neuroimage* 2012;60(1):582-591.
5. Wise RG, Harris AD, Stone AJ, Murphy K. Measurement of OEF and absolute CMRO2: MRI-based methods using interleaved and combined hypercapnia and hyperoxia. *Neuroimage* 2013;83:135-147.
6. Gauthier CJ, Hoge RD. Magnetic resonance imaging of resting OEF and CMRO2 using a generalized calibration model for hypercapnia and hyperoxia. *Neuroimage* 2012;60(2):1212-1225.
7. De Vis JB, Petersen ET, Bhogal A, Hartkamp NS, Klijn CJM, Kappelle LJ, Hendrikse J. Calibrated MRI to evaluate cerebral hemodynamics in patients with an internal carotid artery occlusion. *J Cereb Blood Flow Metab* 2015;35(6):1015-1023.
8. Wong EC, Cronin M, Wu WC, Inglis B, Frank LR, Liu TT. Velocity-selective arterial spin labeling. *Magn Reson Med* 2006;55(6):1334-1341.
9. Le Bihan D, Turner R. The capillary network: A link between IVIM and classical perfusion. *Magn Reson Med* 1992;27(1):171-178.
10. Meier-Ruge W, Hunziker O, Schulz U, Tobler HJ, Schweizer A. Stereological changes in the capillary network and nerve cells of the aging human brain. *Mech Ageing Dev* 1980;14(1-2):233-243.
11. Løkkegaard A, Nyengaard JR, West MJ. Stereological estimates of number and length of capillaries in subdivisions of the human hippocampal region. *Hippocampus* 2001;11(6):726-740.
12. Lauwers F, Cassot F, Lauwers-Cances V, Puwanarajah P, Duvernoy H. Morphometry of the human cerebral cortex microcirculation: General characteristics and space-related profiles. *Neuroimage* 2008;39(3):936-948.
13. Joo I, Lee JM, Han JK, Choi BI. Intravoxel incoherent motion diffusion-weighted MR imaging for monitoring the therapeutic efficacy of the vascular disrupting agent CKD-516 in rabbit VX2 liver tumors1. *Radiology* 2014;272(2):417-426.
14. Guiu B, Petit JM, Capitan V et al. Intravoxel incoherent motion diffusion-weighted imaging in nonalcoholic fatty liver disease: A 3.0-T MR study. *Radiology* 2012;265(1):96-103.
15. Yamada I, Aung W, Himeno Y, Nakagawa T, Shibuya H. Diffusion coefficients in abdominal organs and hepatic lesions: Evaluation with intravoxel incoherent motion echo-planar MR imaging. *Radiology* 1999;210(3):617-623.
16. Luciani A, Vignaud A, Cavet M, Van Nhieu JT, Mallat A, Ruel L, Laurent A, Deux JF, Brugieres P, Rahmouni A. Liver cirrhosis: Intravoxel incoherent motion MR imaging-pilot study. *Radiology* 2008;249(3):891-899.
17. Chow AM, Gao DS, Fan SJ, Qiao Z, Lee FY, Yang J, Man K, Wu EX. Liver fibrosis: An intravoxel incoherent motion (IVIM) study. *J Magn Reson Imaging* 2012;36(1):159-167.
18. Powers TA, Lorenz CH, Holburn GE, Price RR. Renal artery stenosis: In vivo perfusion MR imaging. *Radiology* 1991;178(2):543-548.

19. Sigmund EE, Vivier PH, Sui D et al. Intravoxel incoherent motion and diffusion-tensor imaging in renal tissue under hydration and furosemide flow challenges. *Radiology* 2012;263(3):758-769.
20. Chandarana H, Kang SK, Wong S et al. Diffusion-weighted intravoxel incoherent motion imaging of renal tumors with histopathologic correlation. *Invest Radiol* 2012;47(12):688-696.
21. Kang KM, Lee JM, Yoon JH, Kiefer B, Han JK, Choi BI. Intravoxel incoherent motion diffusion-weighted MR imaging for characterization of focal pancreatic lesions. *Radiology* 2014;270(2):444-453.
22. Re TJ, Lemke A, Klauss M et al. Enhancing pancreatic adenocarcinoma delineation in diffusion derived intravoxel incoherent motion f-maps through automatic vessel and duct segmentation. *Magn Reson Med* 2011;66(5):1327-1332.
23. Lemke A, Laun FB, Simon D, Stieltjes B, Schad LR. An in vivo verification of the intravoxel incoherent motion effect in diffusion-weighted imaging of the abdomen. *Magn Reson Med* 2010;64(6):1580-1585.
24. Bisdas S. Are we ready to image the incoherent molecular motion in our minds? *Neuroradiology* 2013;55(5):537-540.
25. Henkelman RM. Does IVIM measure classical perfusion? *Magn Reson Med* 1990;16(3):470-475.
26. Suo S, Lin N, Wang H, Zhang L, Wang R, Zhang S, Hua J, Xu J. Intravoxel incoherent motion diffusion-weighted MR imaging of breast cancer at 3.0 tesla: Comparison of different curve-fitting methods. *J Magn Reson Imaging* 2015;42(2):362-370.
27. Lemke A, Stieltjes B, Schad LR, Laun FB. Toward an optimal distribution of b values for intravoxel incoherent motion imaging. *Magn Reson Imaging* 2011;29(6):766-776.
28. Pang Y, Turkbey B, Bernardo M, Kruecker J, Kadoury S, Merino MJ, Wood BJ, Pinto PA, Choyke PL. Intravoxel incoherent motion MR imaging for prostate cancer: An evaluation of perfusion fraction and diffusion coefficient derived from different b-value combinations. *Magn Reson Med* 2013;69(2):553-562.
29. Wu WC, Chen YF, Tseng HM, Yang SC, My PC. Caveat of measuring perfusion indexes using intravoxel incoherent motion magnetic resonance imaging in the human brain. *Eur Radiol* 2015;25(8):2485-2492.
30. Pekar J, Moonen CTW, Van Zijl PCM. On the precision of diffusion/perfusion imaging by gradient sensitization. *Magn Reson Med* 1992;23(1):122-129.
31. Kwong KK, McKinstry RC, Chien D, Crawley AP, Pearlman JD, Rosen BR. CSF-suppressed quantitative single-shot diffusion imaging. *Magn Reson Med* 1991;21(1):157-163.
32. Sumi M, Van Cauteren M, Sumi T, Obara M, Ichikawa Y, Nakamura T. Salivary gland tumors: Use of intravoxel incoherent motion MR imaging for assessment of diffusion and perfusion for the differentiation of benign from malignant tumors. *Radiology* 2012;263(3):770-777.
33. Hauser T, Essig M, Jensen A, Gerigk L, Laun FB, Münter M, Simon D, Stieltjes B. Characterization and therapy monitoring of head and neck carcinomas using diffusion-imaging-based intravoxel incoherent motion parameters - Preliminary results. *Neuroradiology* 2013;55(5):527-536.
34. Suh CH, Kim HS, Lee SS, Kim N, Yoon HM, Choi CG, Kim SJ. Atypical imaging features of primary central nervous system lymphoma that mimics glioblastoma: Utility of intravoxel incoherent motion MR imaging. *Radiology* 2014;272(2):504-513.
35. Federau C, O'Brien K, Meuli R, Hagsmann P, Maeder P. Measuring brain perfusion with intravoxel incoherent motion (IVIM): Initial clinical experience. *J Magn Reson Imaging* 2014;39(3):624-632.
36. Kim DY, Kim HS, Goh MJ, Choi CG, Kim SJ. Utility of intravoxel incoherent motion MR imaging for distinguishing recurrent metastatic tumor from treatment effect following gamma knife radiosurgery: Initial experience. *Am J Neurorad* 2014;35(11):2082-2090.
37. Federau C, Maeder P, O'Brien K, Browaeys P, Meuli R, Hagsmann P. Quantitative measurement of brain perfusion with intravoxel incoherent motion MR imaging. *Radiology* 2012;265(3):874-881.



38. Federau C, O'Brien K, Birbaumer A, Meuli R, Hagsmann P, Maeder P. Functional mapping of the human visual cortex with intravoxel incoherent motion MRI. *PLoS ONE* 2015;10(2).
39. McKinstry RC, Weiskoff RM, Belliveau JW, Vevea JM, Moore JB, Kwong KW, Halpern EF, Rosen BR. Ultrafast MR imaging of water mobility: animal models of altered cerebral perfusion. *Journal of magnetic resonance imaging : JMRI* 1992;2(4):377-384.
40. Van Golen LW, Kuijer JPA, Huisman MC, Ijzerman RG, Barkhof F, Diamant M, Lammertsma AA. Quantification of cerebral blood flow in healthy volunteers and type 1 diabetic patients: Comparison of MRI arterial spin labeling and [15O]H<sub>2</sub>O positron emission tomography (PET). *J Magn Reson Imaging* 2014;40(6):1300-1309.
41. Heijtel DFR, Mutsaerts HJMM, Bakker E et al. Accuracy and precision of pseudo-continuous arterial spin labeling perfusion during baseline and hypercapnia: A head-to-head comparison with 15O H<sub>2</sub>O positron emission tomography. *Neuroimage* 2014;92:182-192.
42. Zhang K, Herzog H, Mauler J et al. Comparison of cerebral blood flow acquired by simultaneous [ 15O]water positron emission tomography and arterial spin labeling magnetic resonance imaging. *J Cereb Blood Flow Metab* 2014;34(8):1373-1380.
43. Mezue M, Segerdahl AR, Okell TW, Chappell MA, Kelly ME, Tracey I. Optimization and reliability of multiple postlabeling delay pseudo-continuous arterial spin labeling during rest and stimulus-induced functional task activation. *J Cereb Blood Flow Metab* 2014;34(12):1919-1927.
44. Chappell MA, Groves AR, Whitcher B, Woolrich MW. Variational Bayesian inference for a nonlinear forward model. *IEEE Transactions on Signal Processing* 2009;57(1):223-236.
45. Reese TG, Heid O, Weisskoff RM, Wedeen VJ. Reduction of eddy-current-induced distortion in diffusion MRI using a twice-refocused spin echo. *Magn Reson Med* 2003;49(1):177-182.
46. Zhang YY, Brady M, Smith S. Segmentation of brain MR images through a hidden Markov random field model and the expectation-maximization algorithm. *IEEE Trans Med Imaging* 2001;20(1):45-57.
47. Jenkinson M, Bannister P, Brady M, Smith S. Improved optimization for the robust and accurate linear registration and motion correction of brain images. *Neuroimage* 2002;17(2):825-841.
48. Warnking JM, Pike GB. Bandwidth-modulated adiabatic RF pulses for uniform selective saturation and inversion. *Magn Reson Med* 2004;52(5):1190-1199.
49. Webster M. FUGUE. 2015.
50. Porter DA, Heidemann RM. High resolution diffusion-weighted imaging using readout-segmented echo-planar imaging, parallel imaging and a two-dimensional navigator-based reacquisition. *Magn Reson Med* 2009;62(2):468-475.
51. Stejskal EO, Tanner JE. Spin diffusion measurements: Spin echoes in the presence of a time-dependent field gradient. *The Journal of Chemical Physics* 1965;42(1):288-292.
52. Smith S. FDT. 2015.
53. Andersson JLR, Skare S, Ashburner J. How to correct susceptibility distortions in spin-echo echo-planar images: Application to diffusion tensor imaging. *Neuroimage* 2003;20(2):870-888.
54. Wirestam R, Borg M, Brockstedt S, Lindgren A, Holtås S, Ståhlberg F. Perfusion-related parameters in intravoxel incoherent motion MR imaging compared with CBV and CBF measured by dynamic susceptibility-contrast MR technique. *Acta Radiol* 2001;42(2):123-128.
55. Lin Y, Li J, Zhang Z, Xu Q, Zhou Z, Zhang Z, Zhang Y, Zhang Z. Comparison of intravoxel incoherent motion diffusion-weighted MR imaging and arterial spin labeling MR imaging in gliomas. *BioMed Research International* 2015;2015.
56. Pantano P, Baron JC, Lebrun-Grandie P. Regional cerebral blood flow and oxygen consumption in human aging. *Stroke* 1984;15(4):635-641.
57. Fantini S. Dynamic model for the tissue concentration and oxygen saturation of hemoglobin in relation to blood volume, flow velocity, and oxygen consumption: Implications for functional neuroimaging and coherent hemodynamics spectroscopy (CHS). *Neuroimage* 2014;85:202-221.
58. Federau C, O'Brien K. Increased brain perfusion contrast with T2-prepared intravoxel incoherent motion (T2prep IVIM) MRI. *NMR Biomed* 2015;28(1):9-16.

59. Federau C, Hagmann P, Maeder P, Müller M, Meuli R, Stuber M, O'Brien K. Dependence of Brain Intravoxel Incoherent Motion Perfusion Parameters on the Cardiac Cycle. *PLoS ONE* 2013;8(8).
60. Scouten A, Constable RT. VASO-based calculations of CBV change: Accounting for the dynamic CSF volume. *Magn Reson Med* 2008;59(2):308-315.



## Captions

Table 1: Average grey matter values for each subject in Experiment 1.  $f_v D^*$  is the IVIM perfusion parameter. ASL units are ml/100 g/min;  $D$ ,  $D^*$  and  $f_v D^*$  are all measured in  $\text{m}^2/\text{s}$ .

Figure 1: A subset of slices acquired from a single representative subject. Units are ml/100 g/min for ASL perfusion and  $10^{-3} \text{m}^2/\text{s}$  for IVIM perfusion.  $f_v$  is the capillary blood volume fraction in each voxel.

Figure 2: Plots comparing ASL perfusion with IVIM perfusion across the 10 subjects (a) and IVIM blood volume fraction (b) in grey matter. No significant correlation was observed in either case.

Figure 3: Single-slice IVIM results from Experiment 2, acquired with and without CSF-suppression.  $b = 0$  images demonstrate that CSF was successfully suppressed by the sequence. Also shown is the double inversion recovery (DIR) image, which was thresholded to produce the grey matter (GM) mask. Blood volume fraction is  $f_v$ , IVIM perfusion is  $f_v D^*$  in units of  $\text{m}^2/\text{s}$ . ASL perfusion has units of ml/100 g/min.

Figure 4: Plots showing the mono- and biexponential fits to IVIM signals from standard and CSF-suppressed data, after averaging over all grey matter voxels. The biexponential model is clearly a better fit for the standard IVIM data, whereas the monoexponential model appears sufficient for CSF-suppressed data. Note the different signal scales for the two cases.

Figure 5: High-resolution IVIM data acquired with a rs-EPI diffusion sequence. Both blood volume fraction ( $f_v$ ) and perfusion ( $f_v D^*$ ) are elevated in voxels containing high fractions of CSF, and no noticeable contrast is observed between grey and white matter.

Figure 6: Plots of IVIM fits to single voxel data, taken from randomly selected pure tissue voxels in the slice shown in figure 5. Each  $b$ -value has 18 data points corresponding to 3 diffusion directions and 6 repeats.  $R^2$  values are highest in CSF voxels, presumably because of higher signal levels (see standard IVIM  $b = 0$  image in figure 3 for an example of raw diffusion data). The monoexponential fits shown are for comparison only and were derived from all 16  $b$ -values; they do not represent the fits performed to calculate  $D$ .

Figure 7: Results of Experiment 3 in all 6 subjects. Columns display one slice of the structural image (arbitrary units) and the blood volume fraction  $f_v$ , followed by histograms correlating voxelwise GM, WM and CSF partial volume estimates (pve) against blood volume fraction. Voxels containing only a single tissue type are not included in these plots.

Figure 8: Box plots of the blood volume fraction ( $f_v$ ) and perfusion ( $f_v D^*$ ) values observed in pure GM, WM and CSF voxels for a single representative subject.

ASL  
perfusion

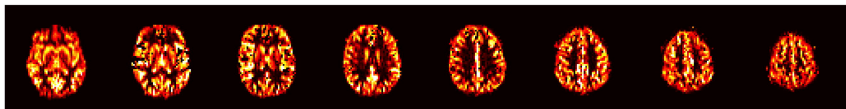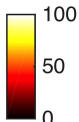

IVIM  
perfusion

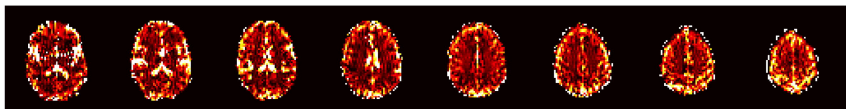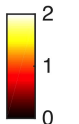

IVIM  
 $f_v$

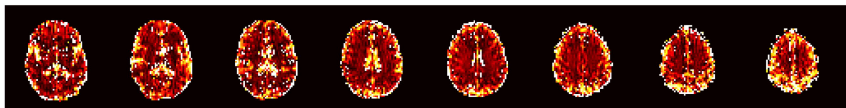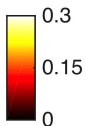

IVIM  
GM mask

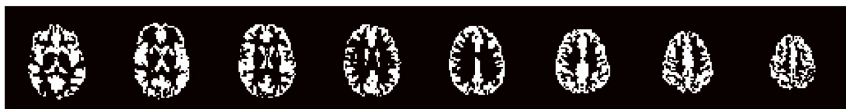

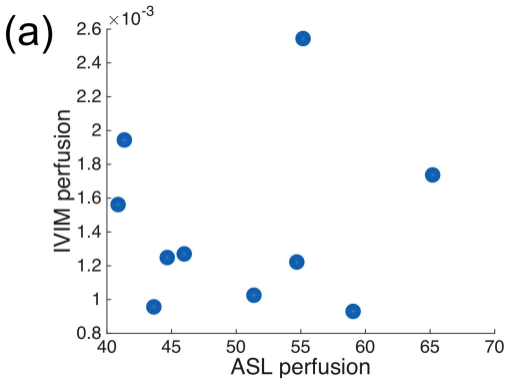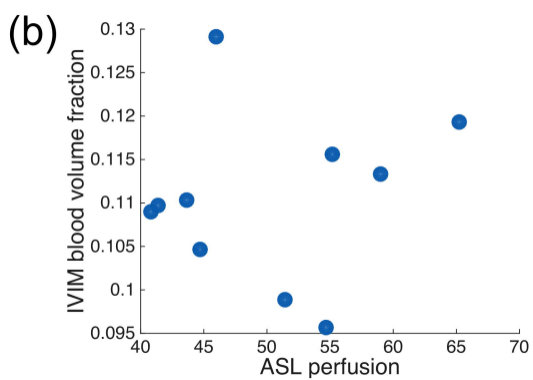

# Standard IVIM

# CSF-suppressed IVIM

DIR

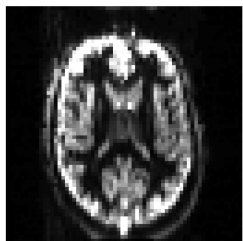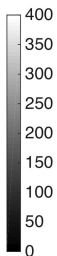

IVIM b=0

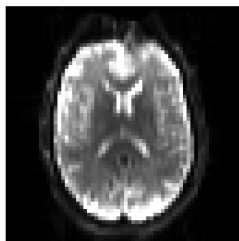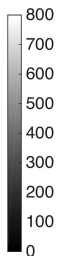

IVIM b=0

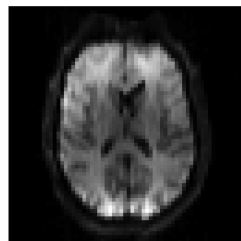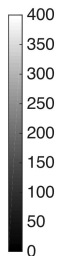

GM mask

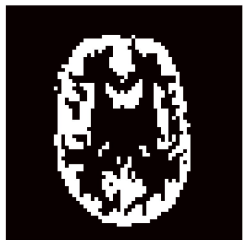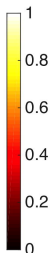

Blood volume fraction

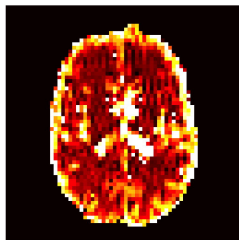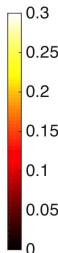

Blood volume fraction

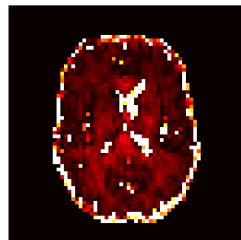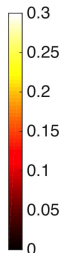

ASL perfusion

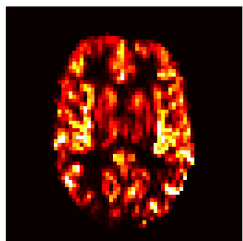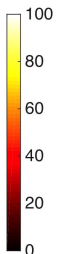

Perfusion

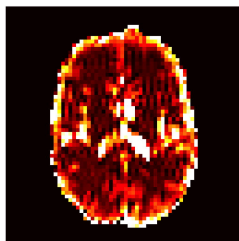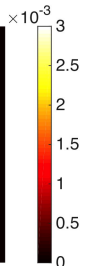

Perfusion

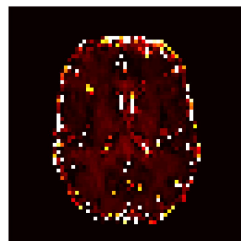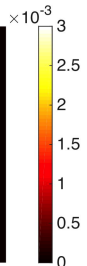

## Standard IVIM fit

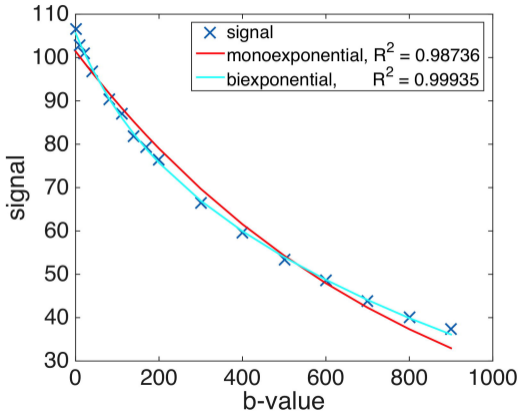

## CSF-suppressed IVIM fit

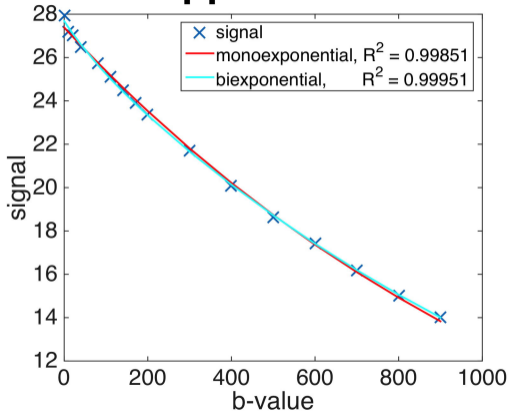

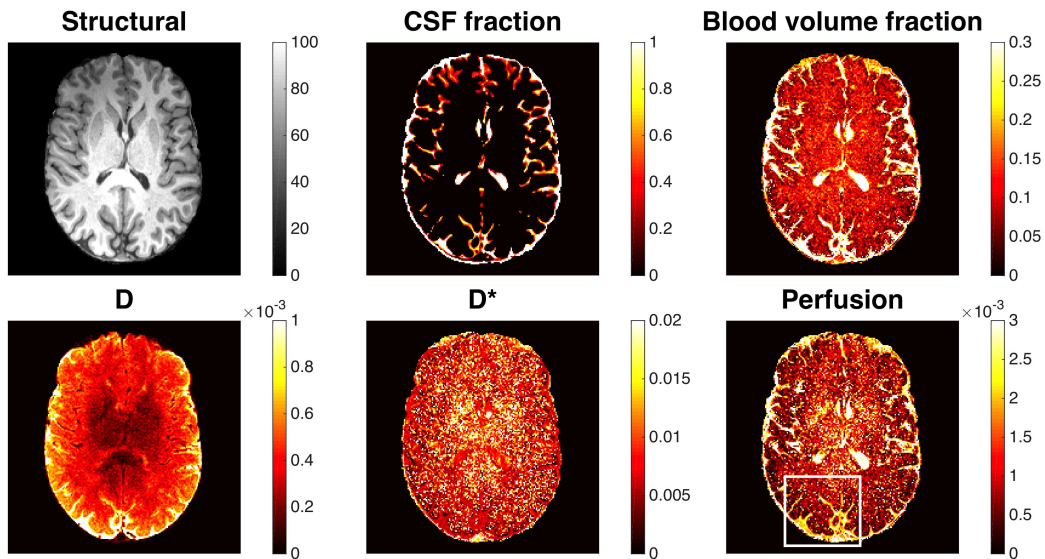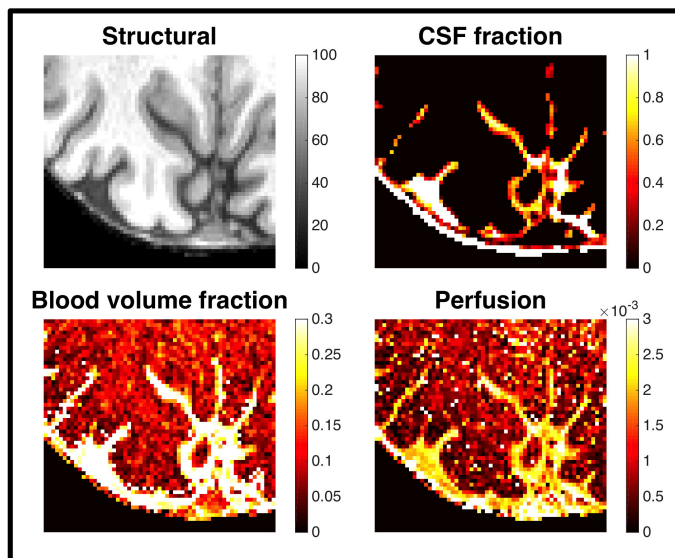

## GM fit

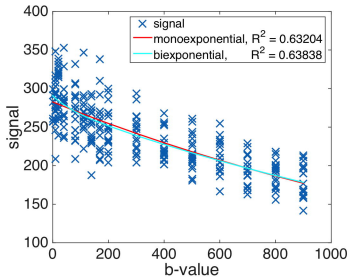

$$S_0 = 291 \quad f_v = 0.048$$
$$D = 4.88 \times 10^{-4} \quad D^* = 0.015$$

## WM fit

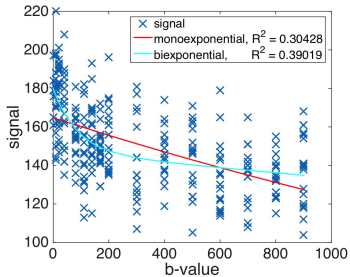

$$S_0 = 180 \quad f_v = 0.183$$
$$D = 9.57 \times 10^{-5} \quad D^* = 0.016$$

## CSF fit

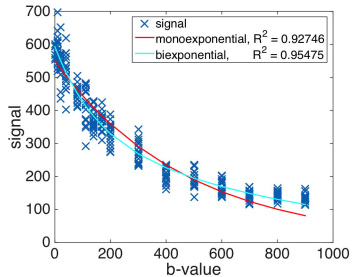

$$S_0 = 593 \quad f_v = 0.412$$
$$D = 0.0012 \quad D^* = 0.0073$$



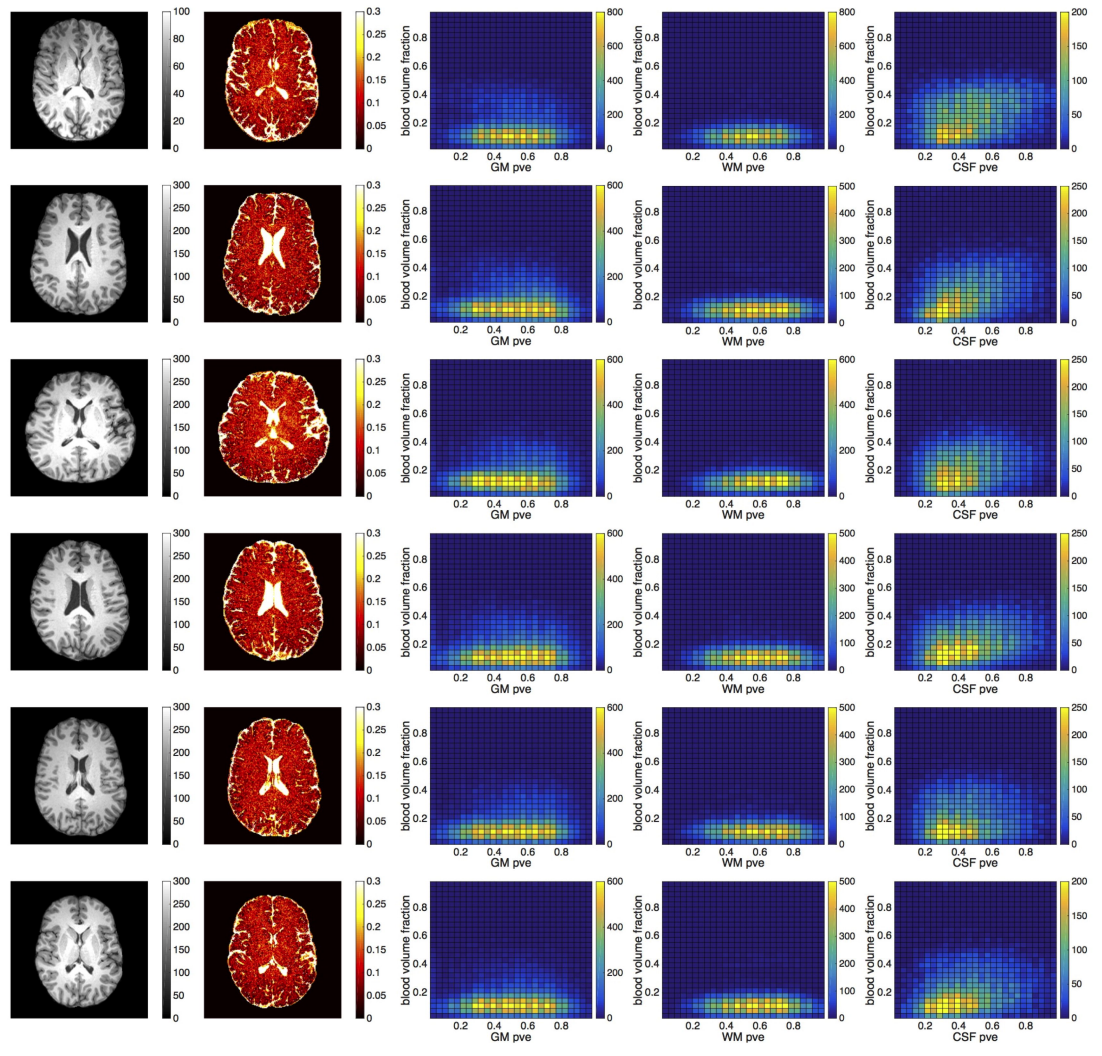

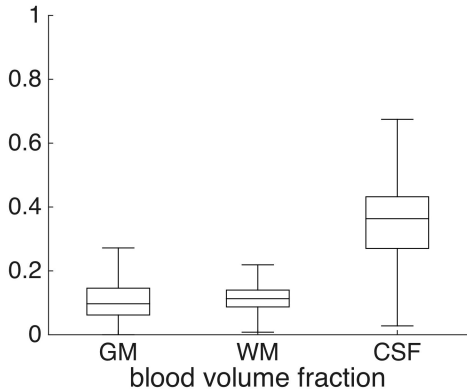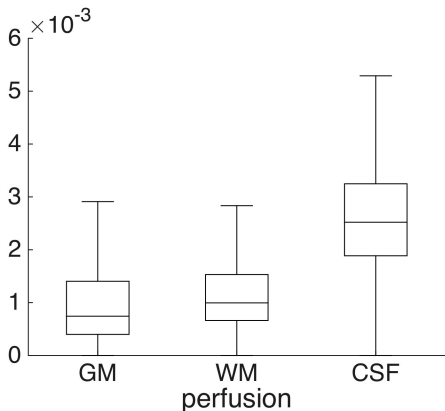

| Subject        | ASL<br>perfusion | $f_v$           | $D$<br>( $\times 10^{-3}$ ) | $D^*$<br>( $\times 10^{-3}$ ) | $f_v D^*$<br>( $\times 10^{-3}$ ) |
|----------------|------------------|-----------------|-----------------------------|-------------------------------|-----------------------------------|
| 1              | 43.6             | 0.11            | 0.93                        | 10.40                         | 0.96                              |
| 2              | 40.8             | 0.11            | 0.92                        | 12.71                         | 1.56                              |
| 3              | 59.0             | 0.11            | 0.92                        | 9.00                          | 0.93                              |
| 4              | 54.7             | 0.10            | 0.84                        | 12.09                         | 1.22                              |
| 5              | 55.2             | 0.12            | 0.92                        | 15.44                         | 2.54                              |
| 6              | 46.0             | 0.13            | 0.94                        | 10.17                         | 1.27                              |
| 7              | 44.7             | 0.10            | 0.95                        | 11.52                         | 1.25                              |
| 8              | 41.3             | 0.11            | 0.88                        | 14.79                         | 1.94                              |
| 9              | 51.4             | 0.10            | 0.89                        | 9.46                          | 1.02                              |
| 10             | 65.2             | 0.12            | 0.92                        | 12.09                         | 1.74                              |
| mean $\pm$ std | 50.2 $\pm$ 8.2   | 0.11 $\pm$ 0.01 | 0.91 $\pm$ 0.03             | 11.77 $\pm$ 2.14              | 1.44 $\pm$ 0.51                   |
